# Supplementary material
Source: Springer Nature journal article supplement (https://www.springermedizin.de/resource/supplementary/12879_2010_1083_MOESM1_ESM.pdf/9441818)
Supplement: MOESM1 [file 9441818]

Women who were positive for HBsAg

n = 51

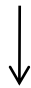

Women who were mothers

n = 40

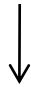

Mothers who were positive for  
HLA-A24

n = 28

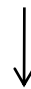

Mothers whose children were  
positive for HLA-A24

n = 11

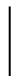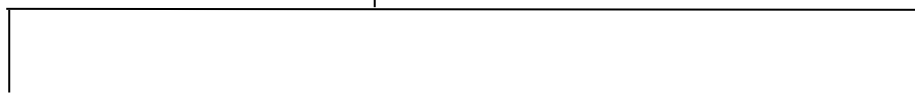

Both mothers and children were positive  
for HBsAg and HLA-A24

Both mothers and children were positive for HLA-A24,  
but children were negative for HBsAg

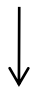

3 families

(3 mothers, 3 children)

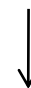

8 families

(8 mothers, 13 children)
